# Supplementary material for: Effect of Long-Term Adaptation to Cold and Short-Term Cooling on the Expression of the TRPM2 Ion Channel Gene in the Hypothalamus of Rats
Source: MDPI journal article supplement (doi:10.3390/cimb45020065), 2023-01-20
Supplement: s1 [file s1]

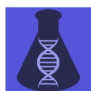

Supplementary Materials

## Effect of Long-Term Adaptation to Cold and Short-Term Cooling on the Expression of the TRPM2 Ion Channel Gene in the Hypothalamus of Rats

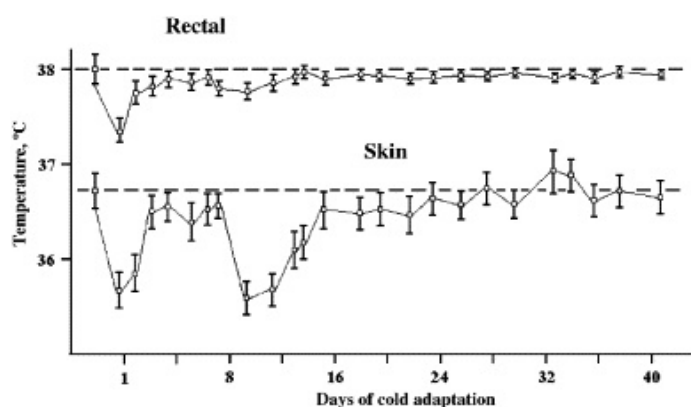

**Figure S1.** The time-courses of the skin temperature in the area of *n. sapheni* innervation and rectal temperature during 6 weeks adaptation to cold. Dashed lines represent the mean skin and rectal temperatures in control rats in the warm environment. The recordings of temperatures were daily made. Bars are SEM (from Kozyreva [38]).

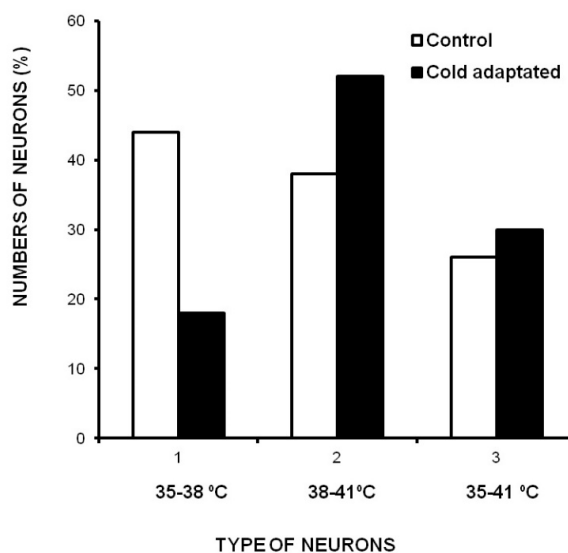

**Figure S2.** Number (%) of different types of neurons with different ranges of thermosensitivity (1, 2 and 3) in the medial preoptic area of hypothalamus in the control and cold-adapted rats. Diagrams of the neuron thermosensitivity are indicated at the bottom (from Kozyreva, Pierau [42], and Kozyreva [38] with modification).
